# Supplementary material
Source: ML conference proceedings conference paper supplement (https://openreview.net/forum?id=I0wEUVzbNY)

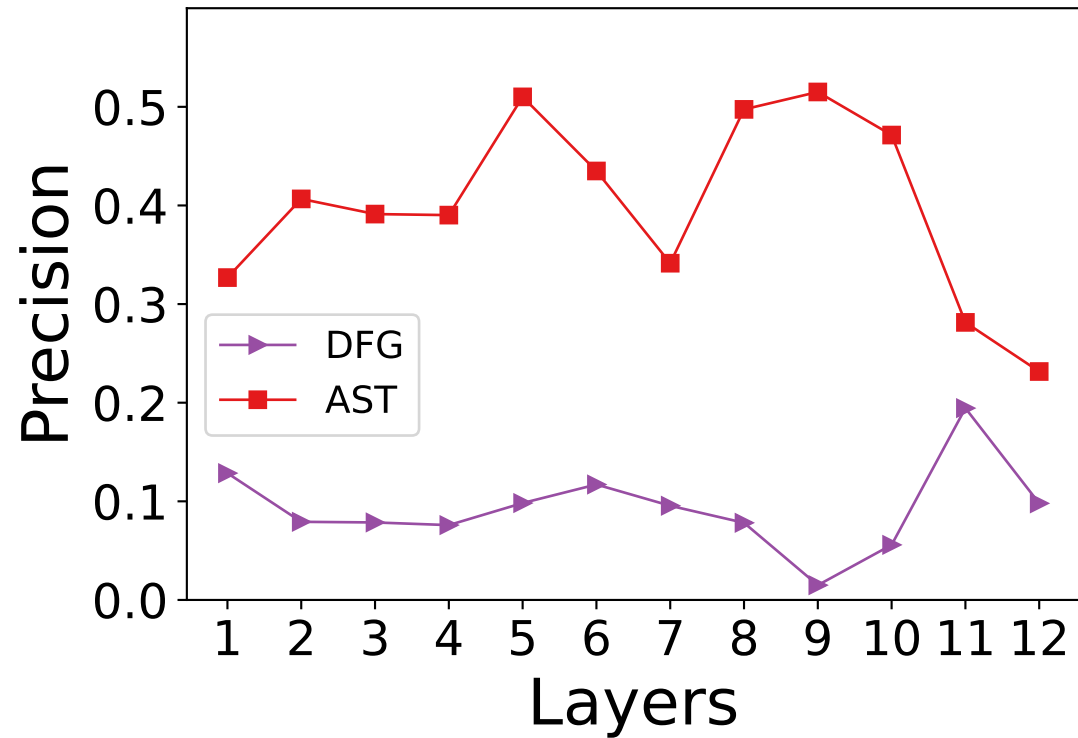

Supplement: supplementary_material [file attachment]

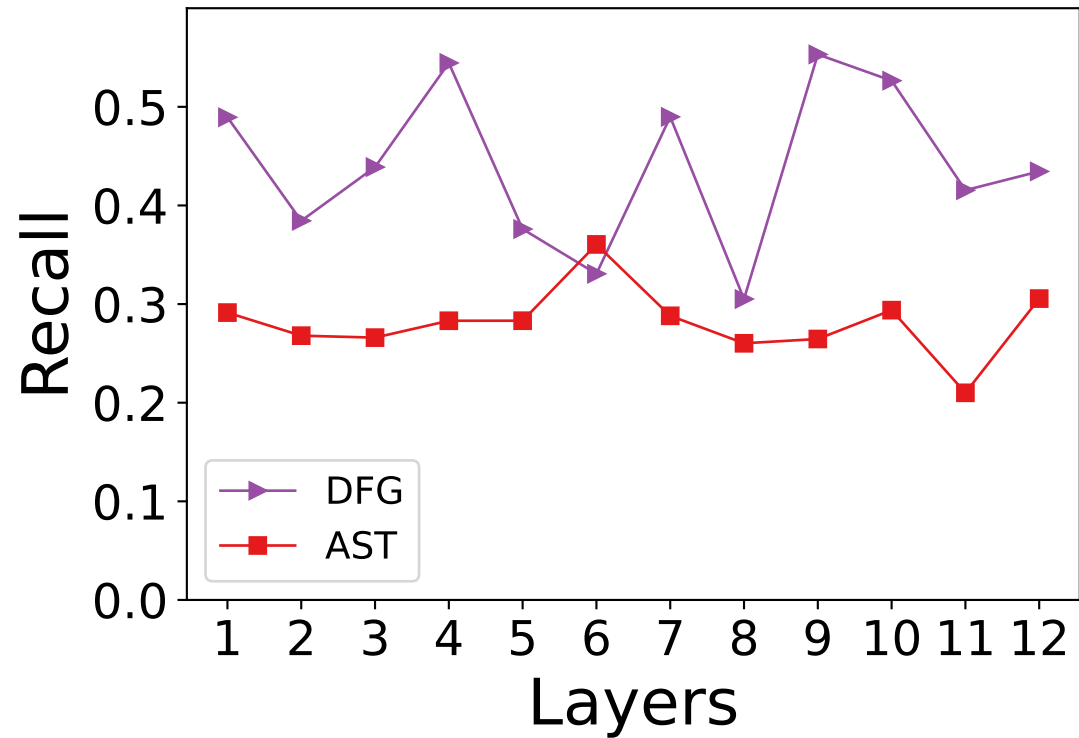

Supplement: supplementary_material [file attachment]

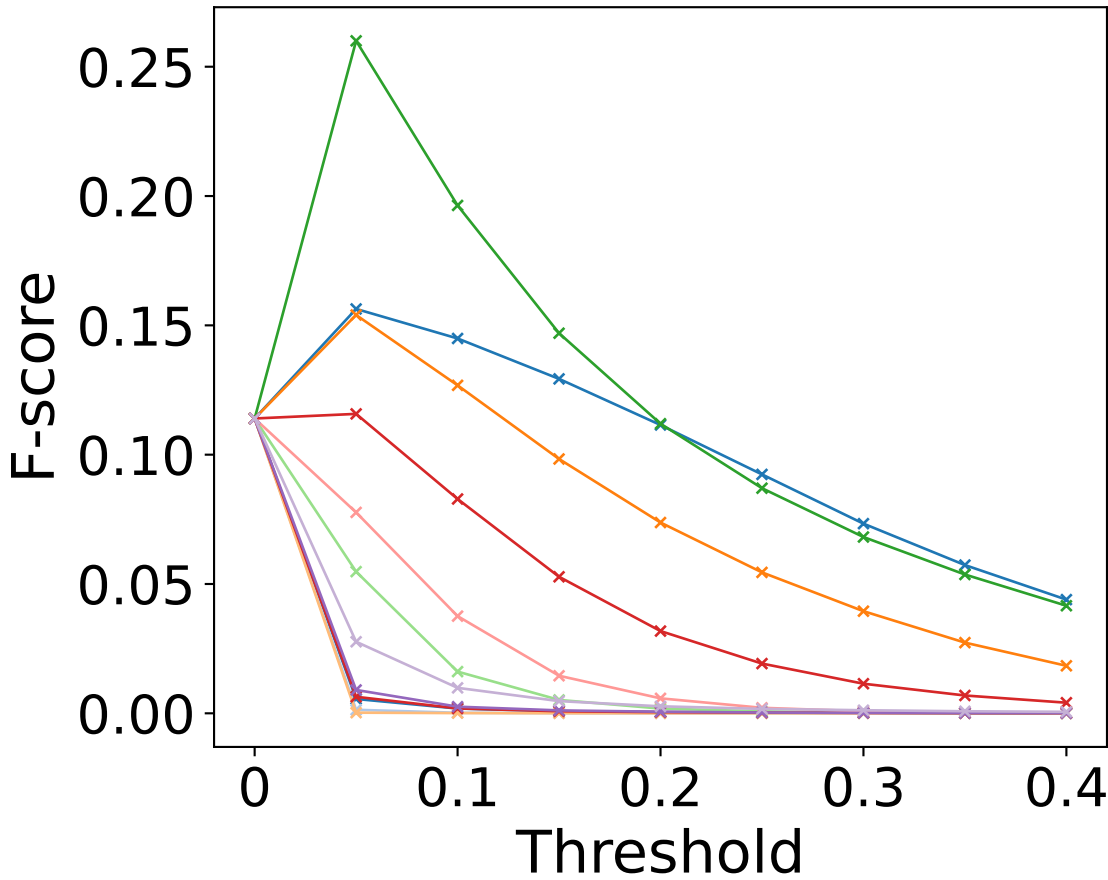

Supplement: supplementary_material [file attachment]

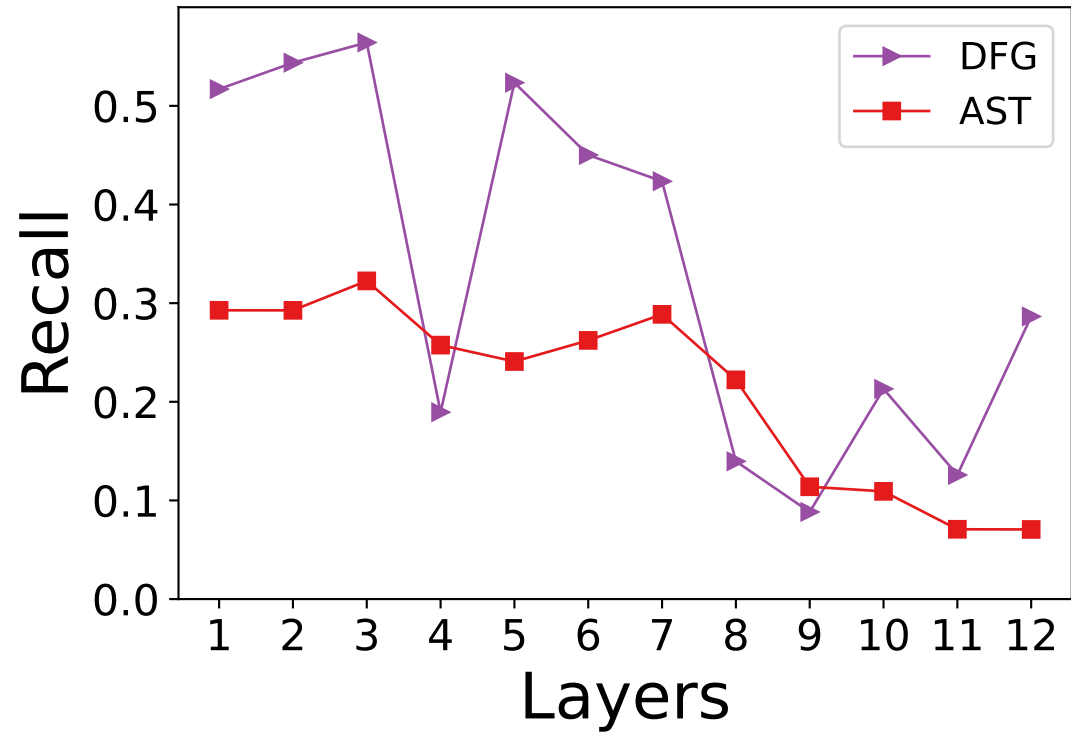

Supplement: supplementary_material [file attachment]

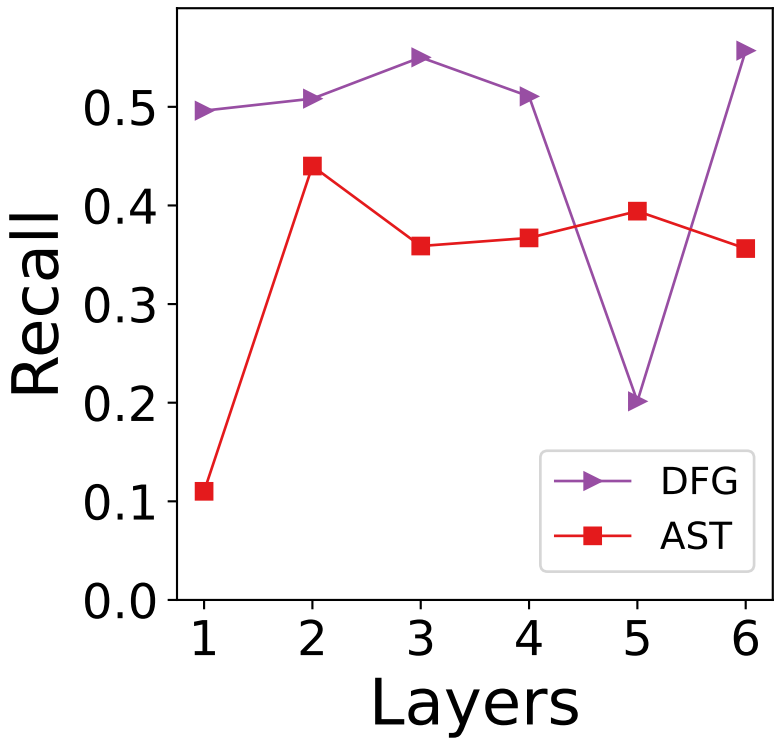

Supplement: supplementary_material [file attachment]

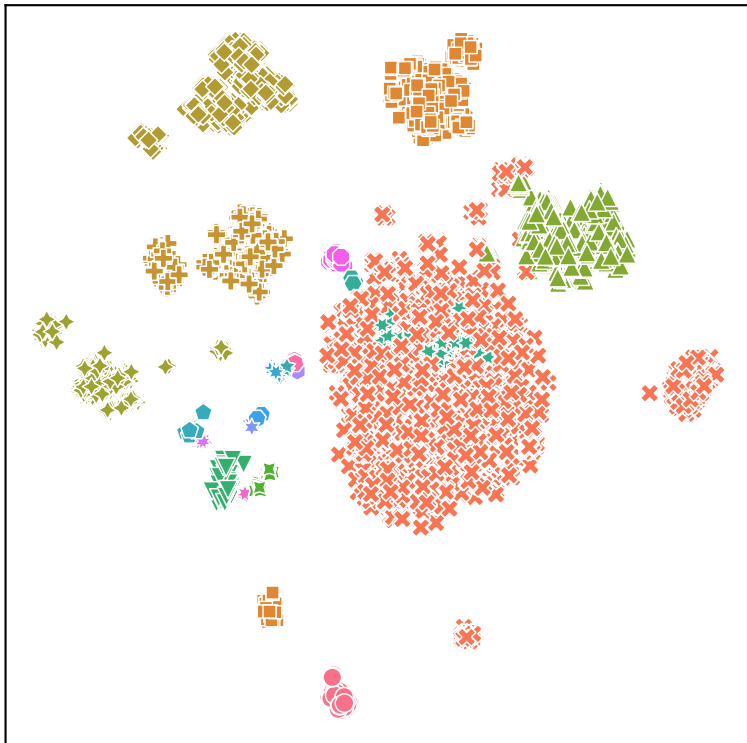

- def
- identifier
- (
- ,
- )
- :
- .
- for
- if
- "
- 
- !=
- else
- ==
- or
- and
- >
- elif
- +
- while
- <

Supplement: supplementary_material [file attachment]

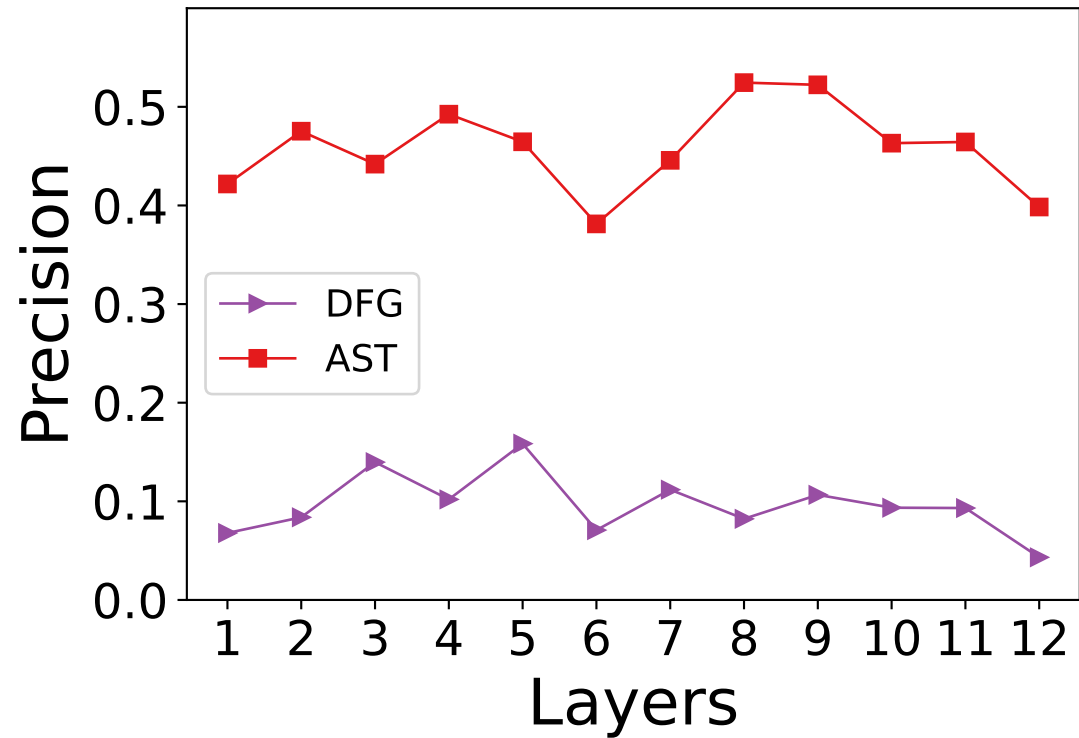

Supplement: supplementary_material [file attachment]

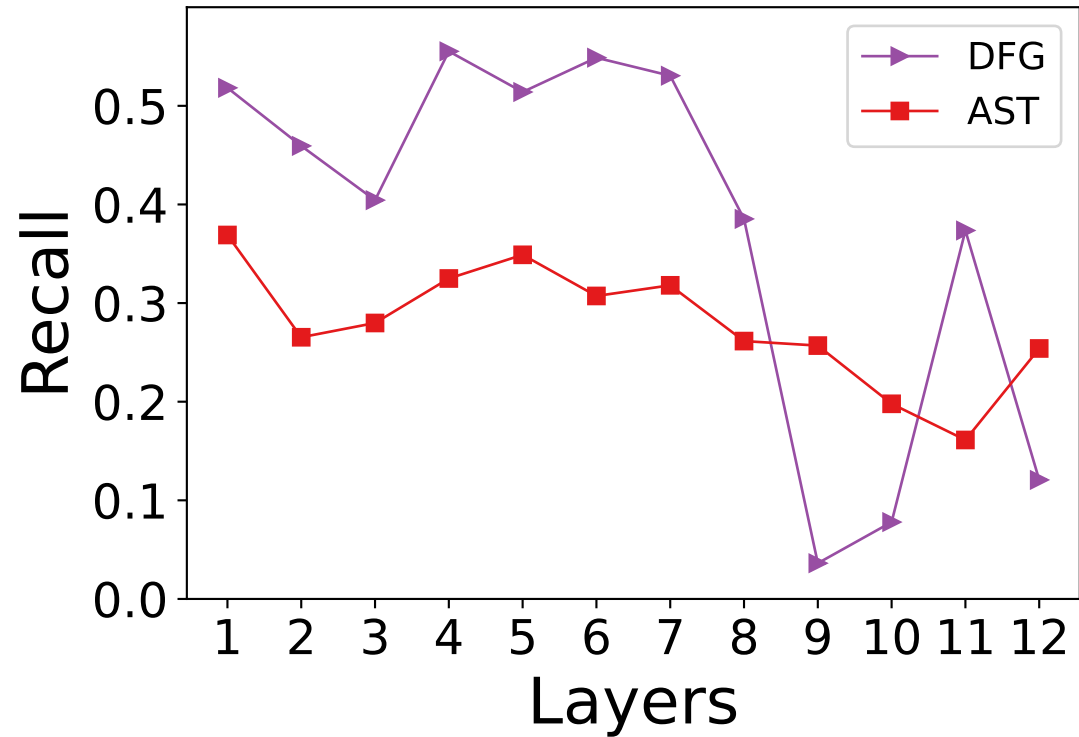

Supplement: supplementary_material [file attachment]

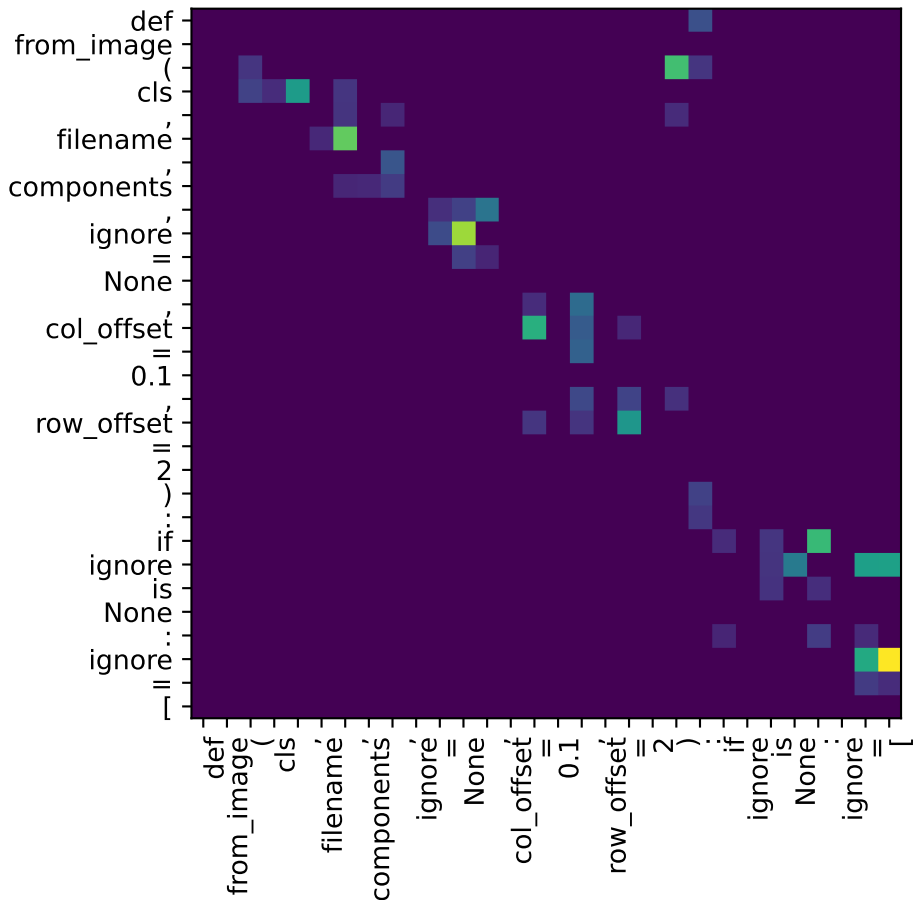

Supplement: supplementary_material [file attachment]

GED per Node

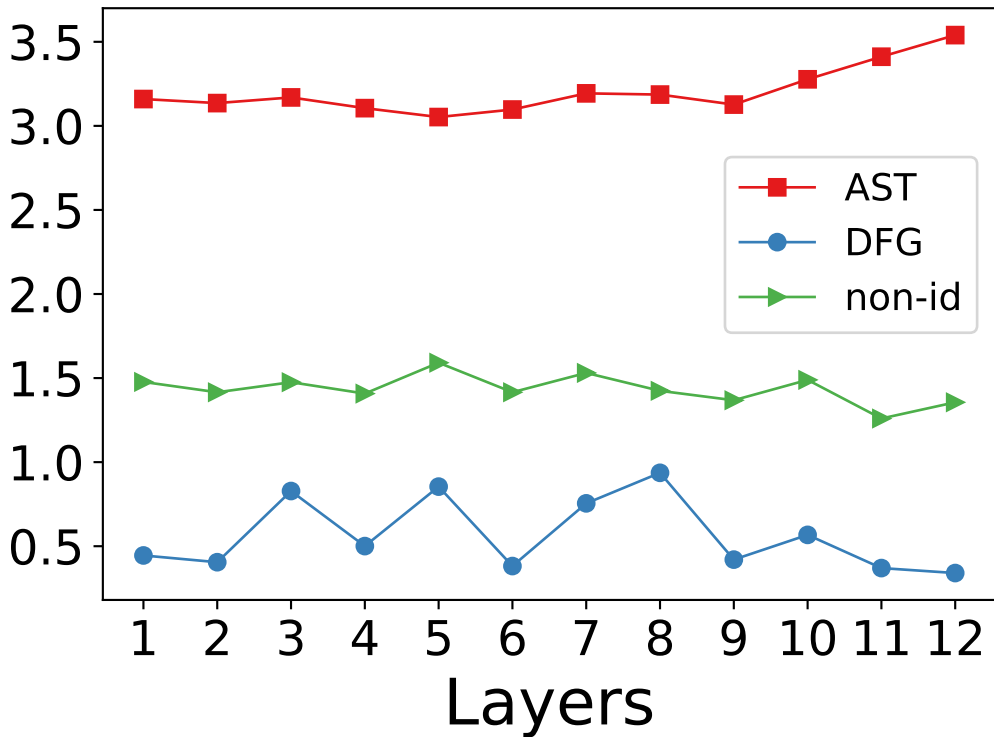

Supplement: supplementary_material [file attachment]

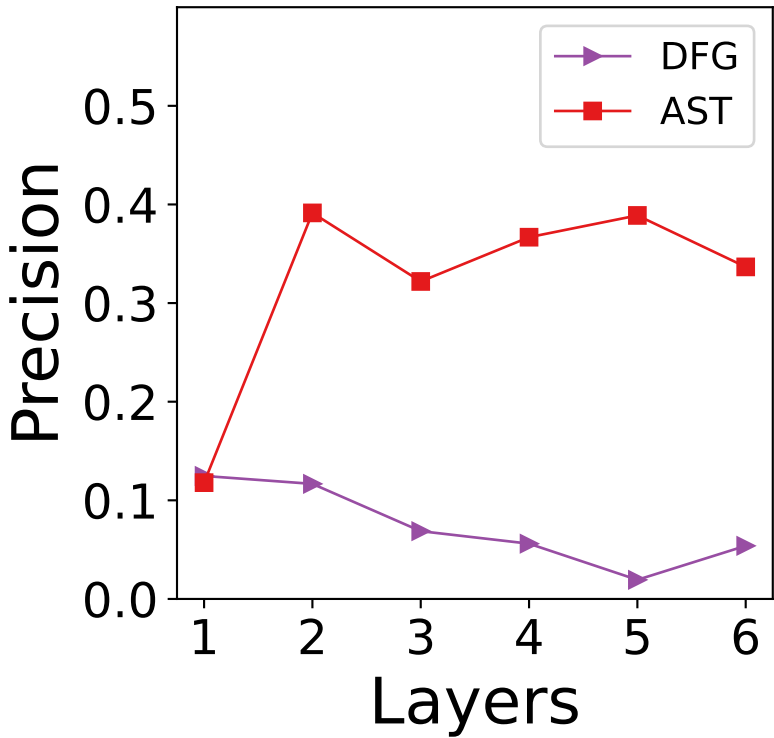

Supplement: supplementary_material [file attachment]

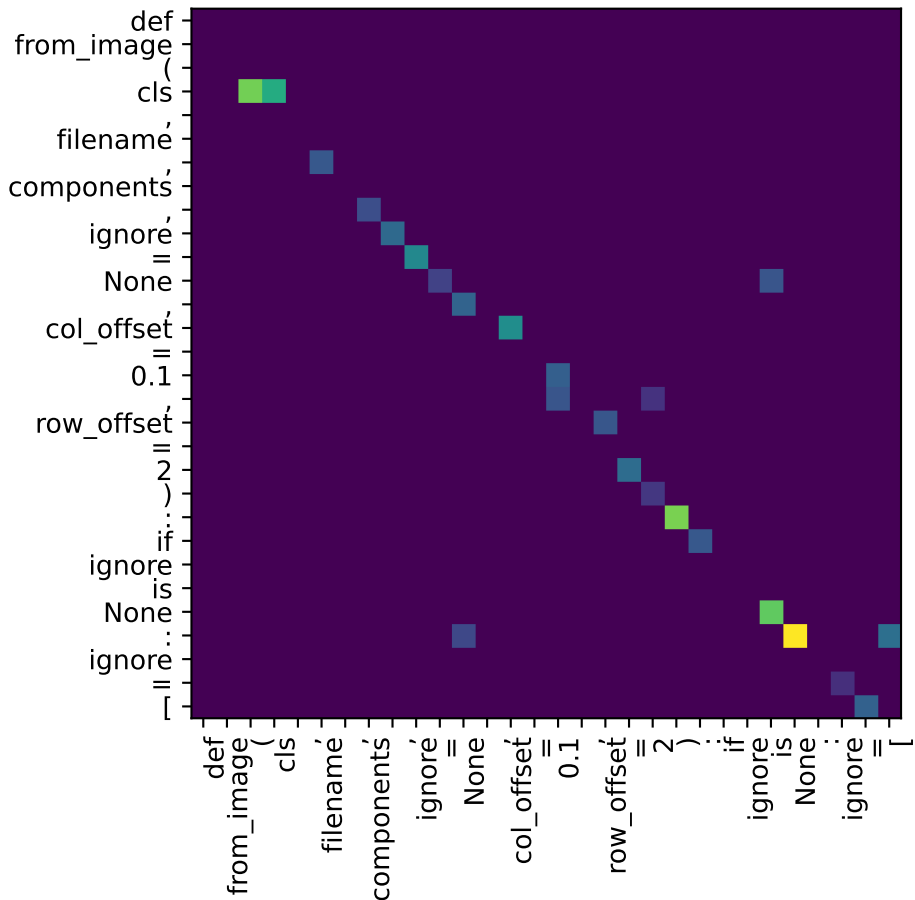

Supplement: supplementary_material [file attachment]

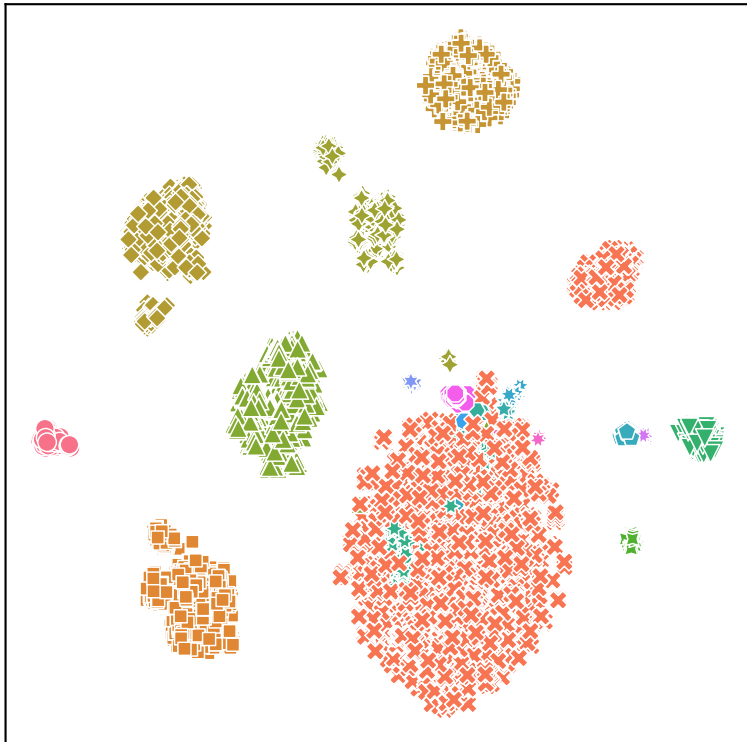

- def
- identifier
- (
- ,
- )
- :
- .
- for
- if
- "
- 
- !=
- else
- ==
- or
- and
- >
- elif
- while
- <

Supplement: supplementary_material [file attachment]

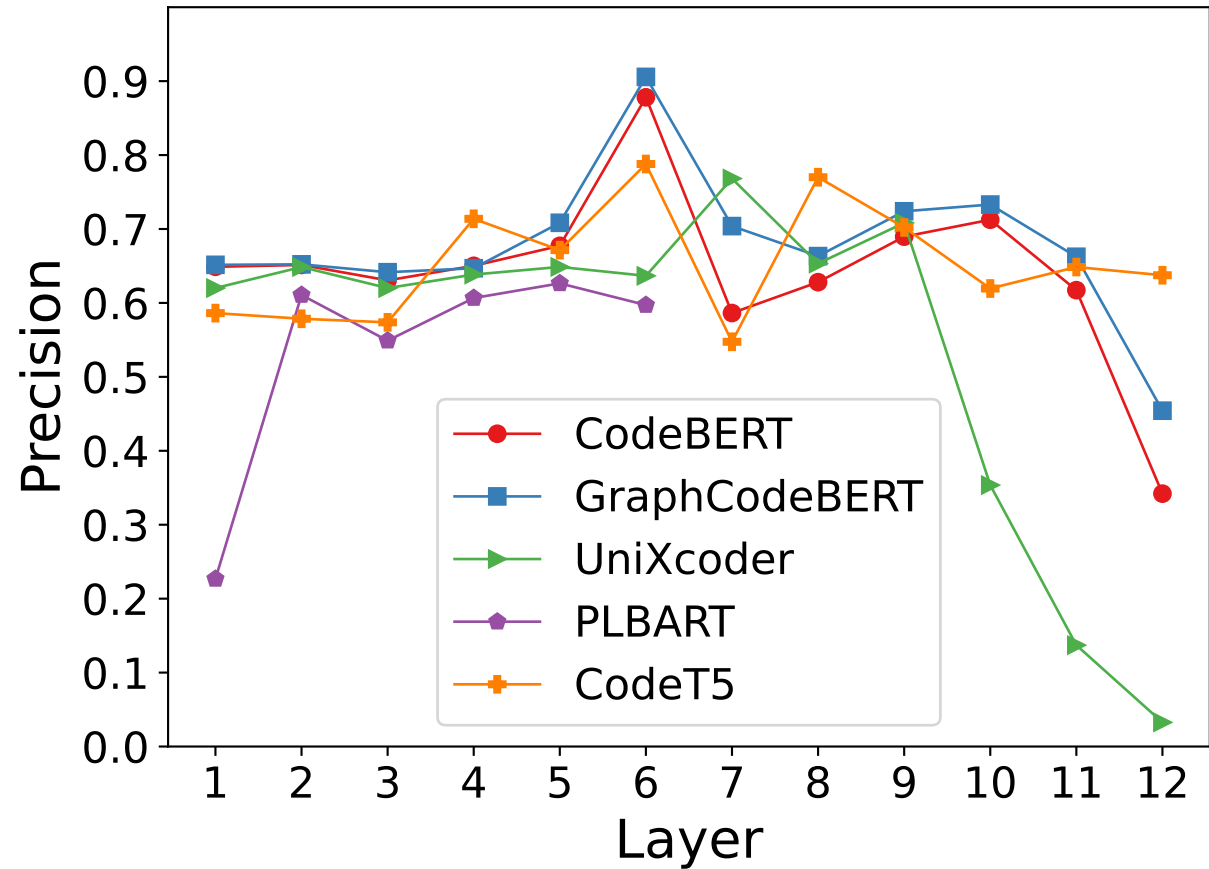

Supplement: supplementary_material [file attachment]

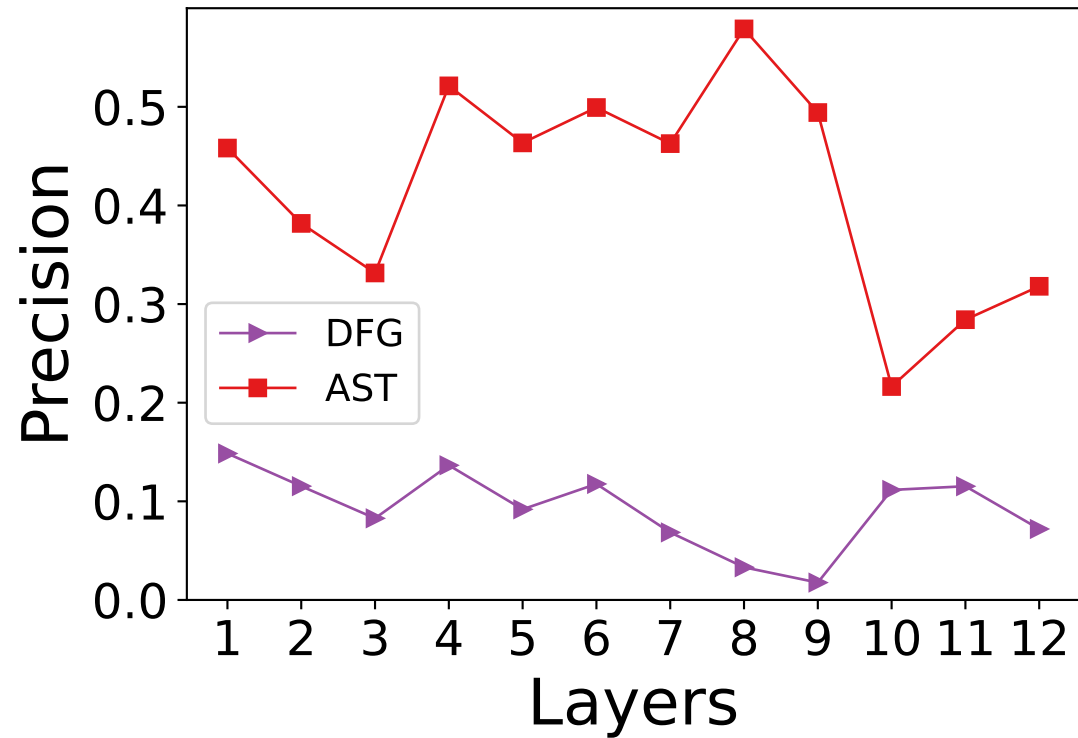

Supplement: supplementary_material [file attachment]

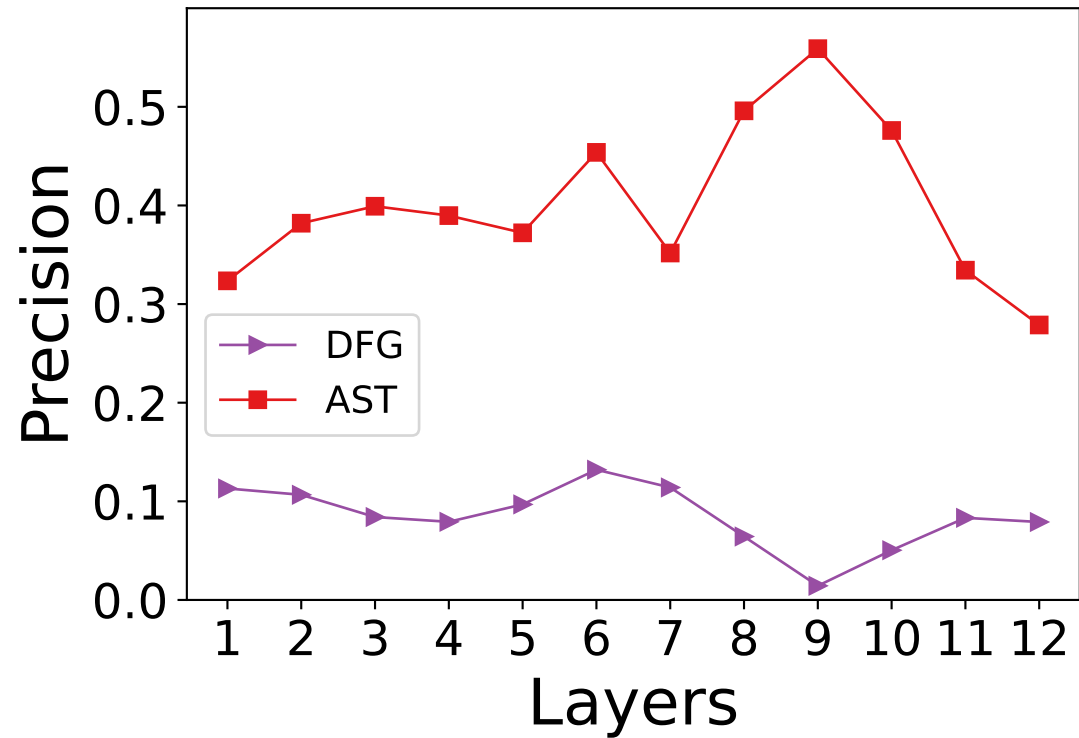

Supplement: supplementary_material [file attachment]

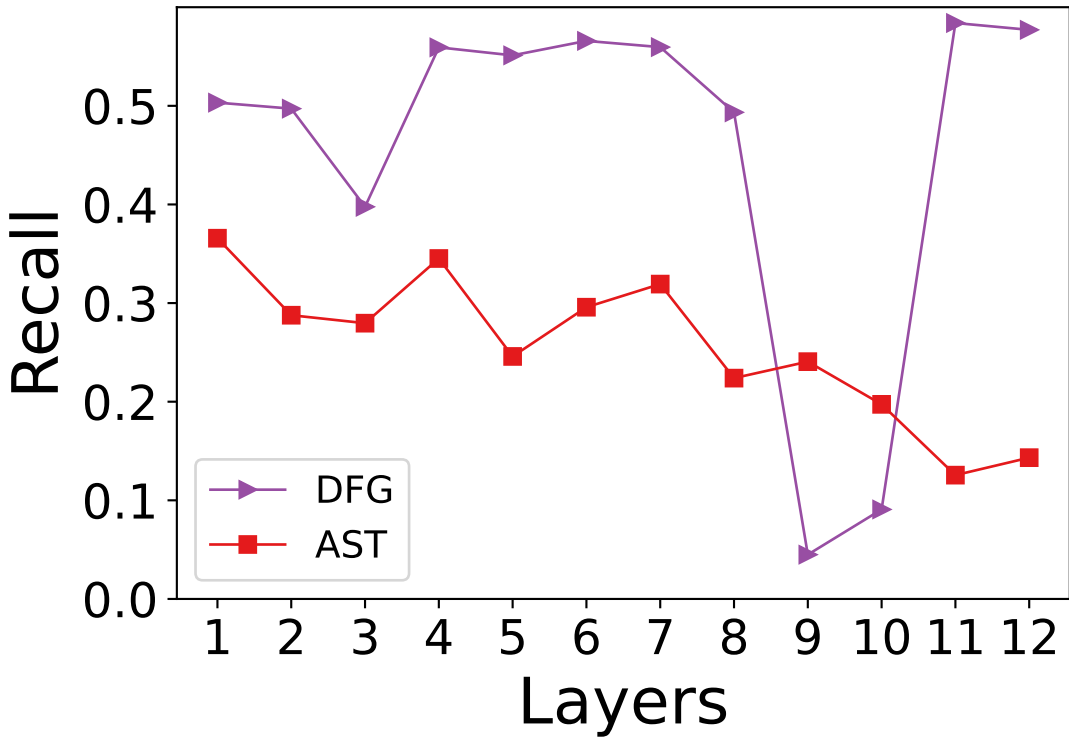

Supplement: supplementary_material [file attachment]

GED per Node

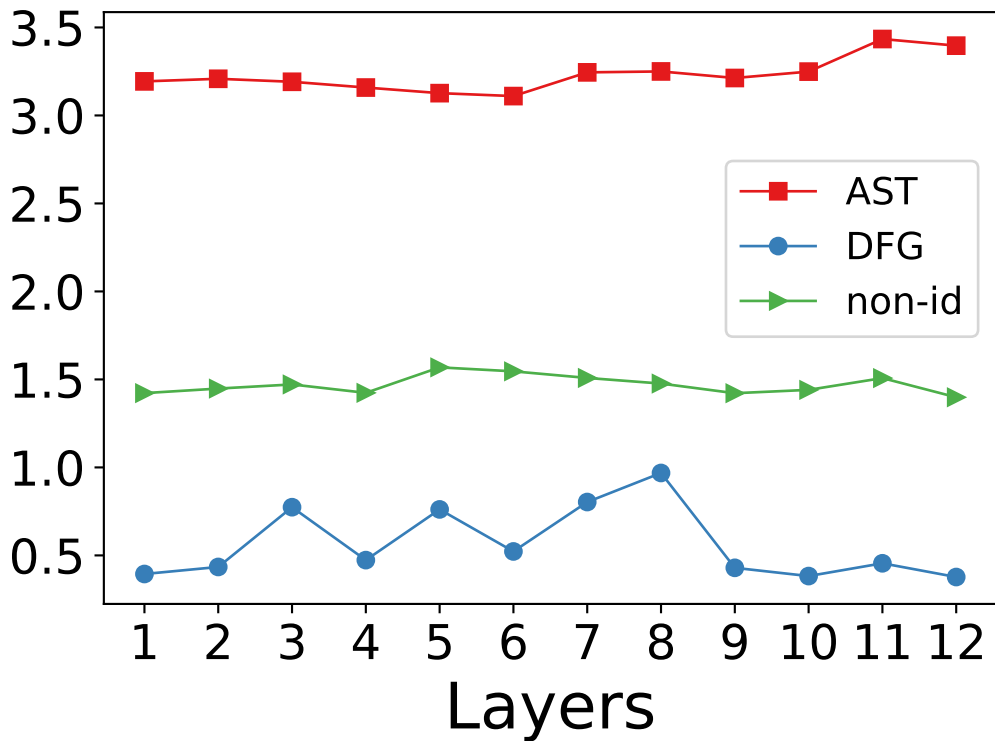

Supplement: supplementary_material [file attachment]

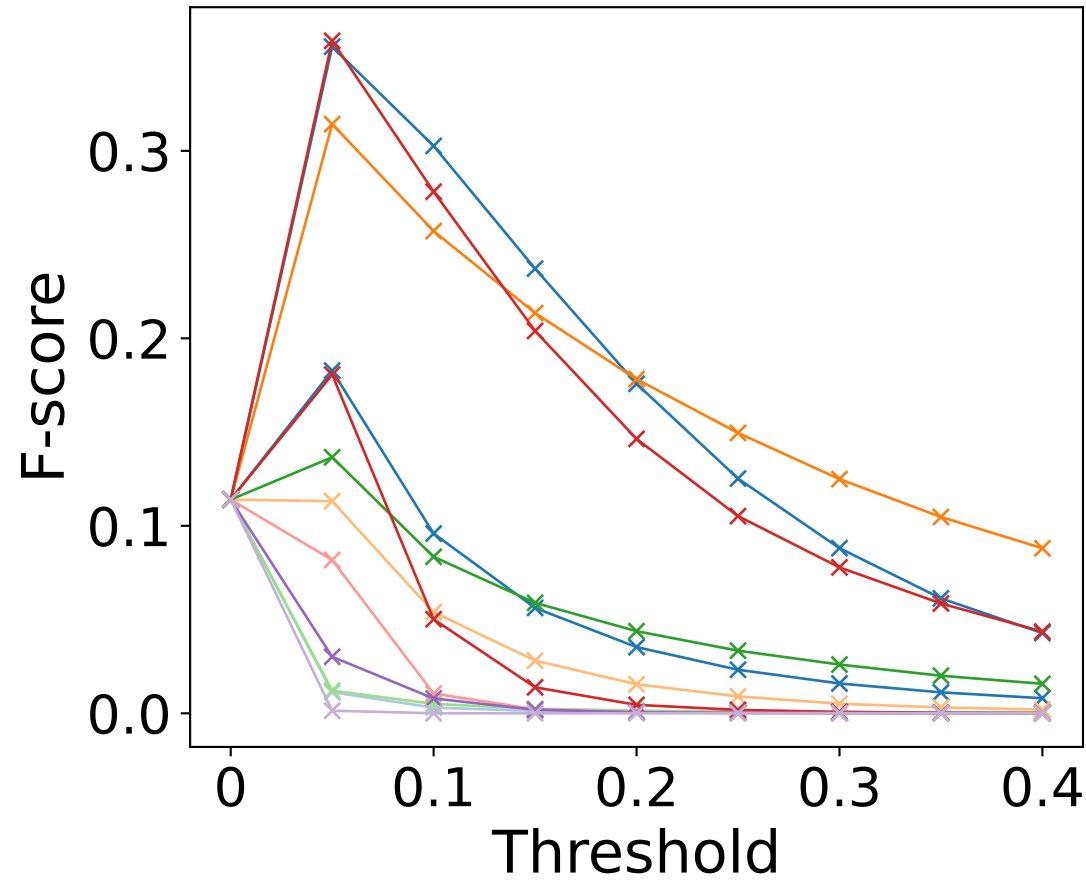

Supplement: supplementary_material [file attachment]

GED per Node

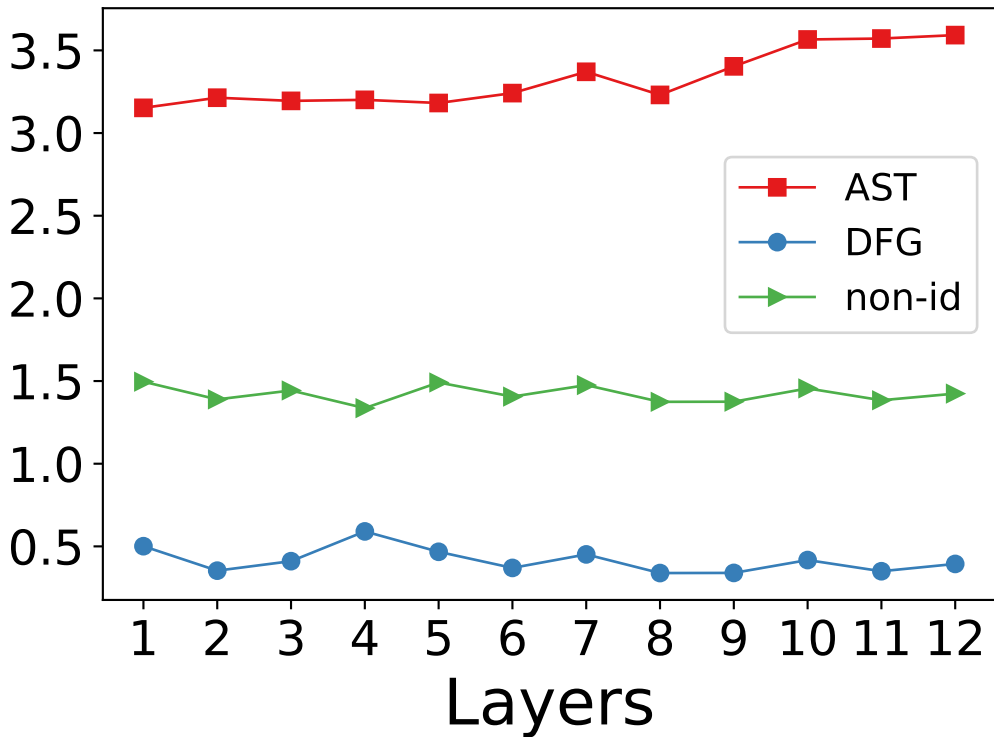

Supplement: supplementary_material [file attachment]

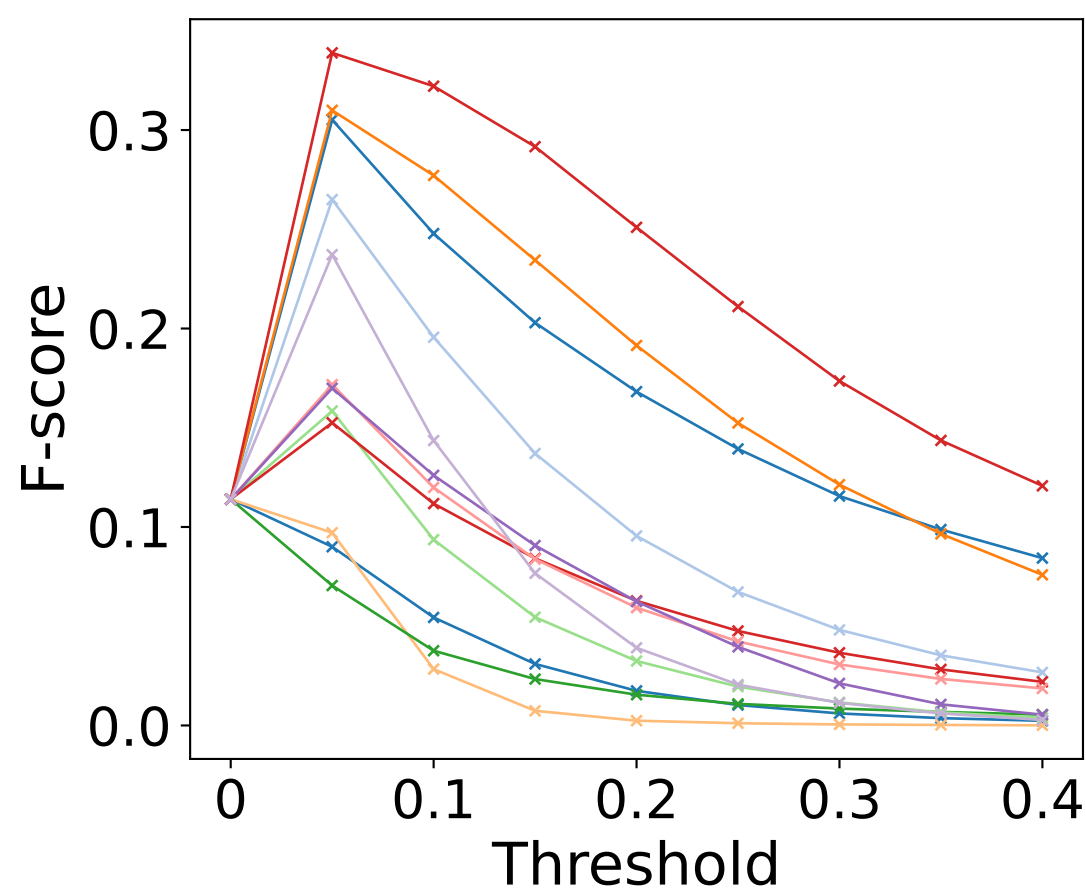

Supplement: supplementary_material [file attachment]

GED per Node

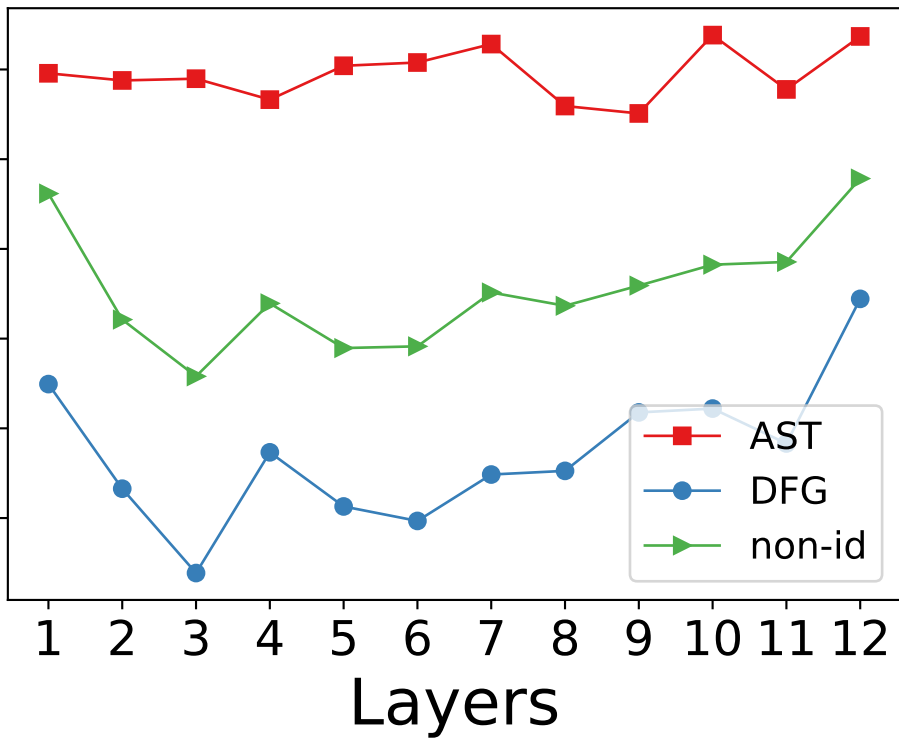

Supplement: supplementary_material [file attachment]

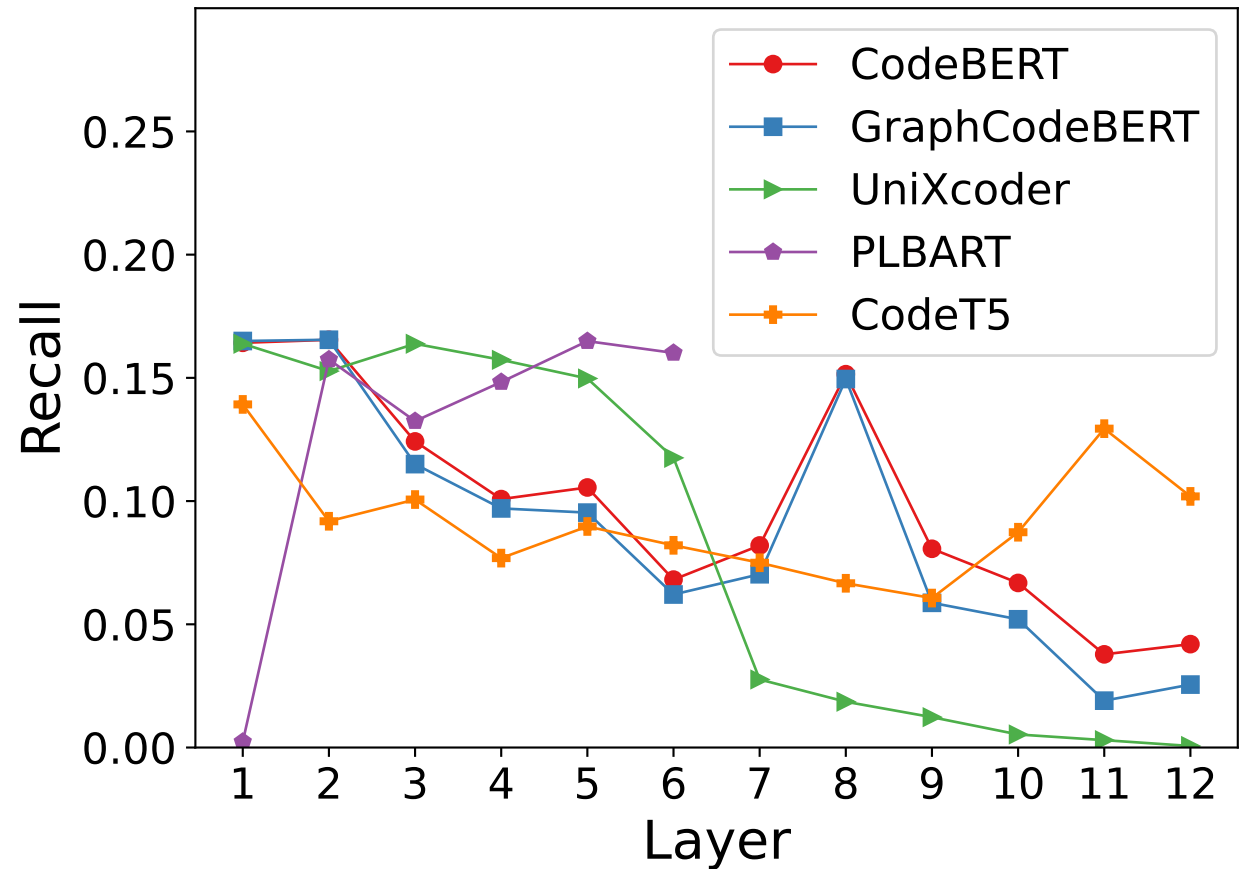

Supplement: supplementary_material [file attachment]

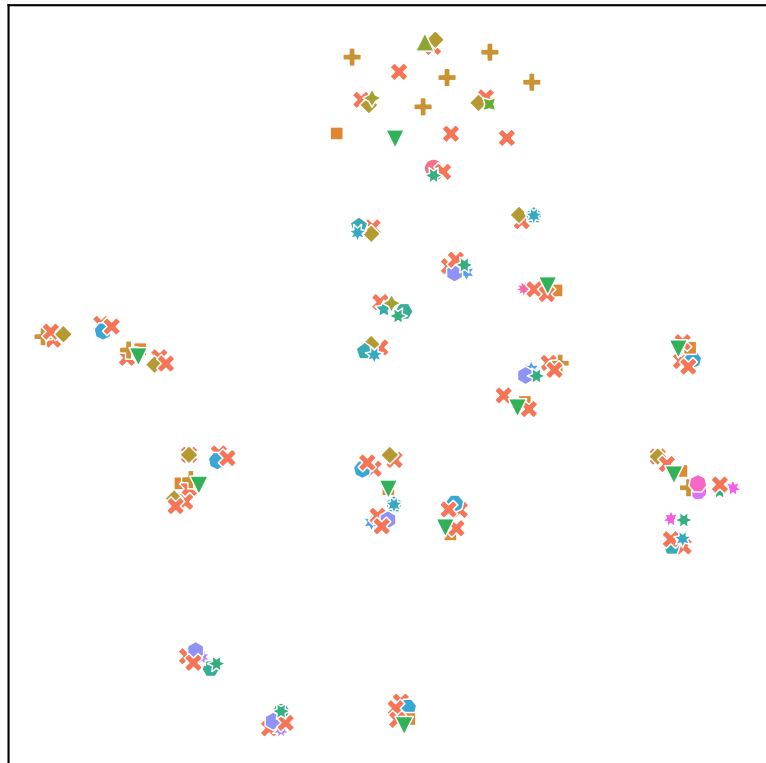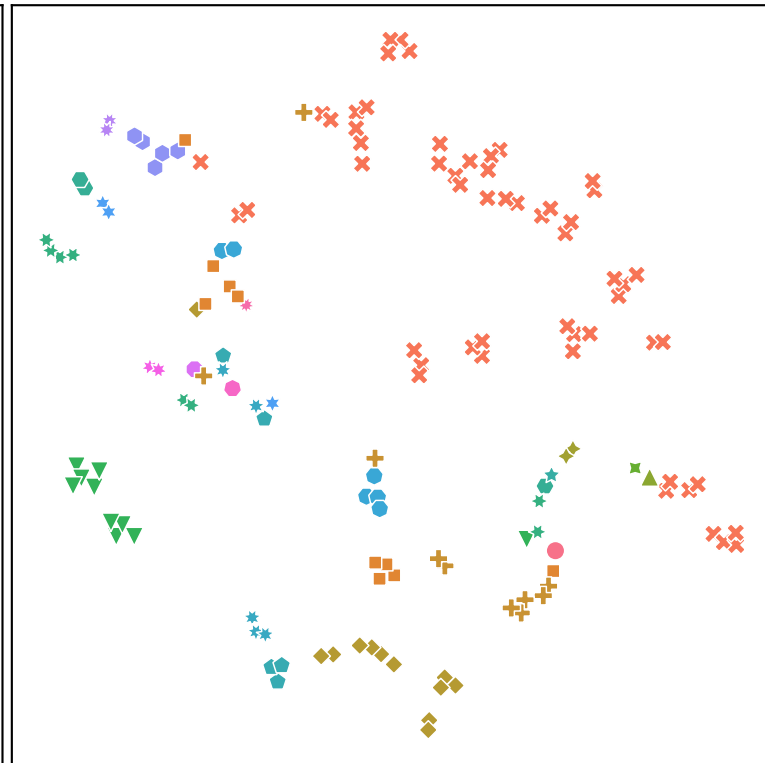

- def
- identifier
- (
- ,
- =
- none
- float
- integer
- )
- :
- if
- is
- [
- ]
- .
- for
- in
- not
- {
- "
- }
- return

Supplement: supplementary_material [file attachment]

GED per Node

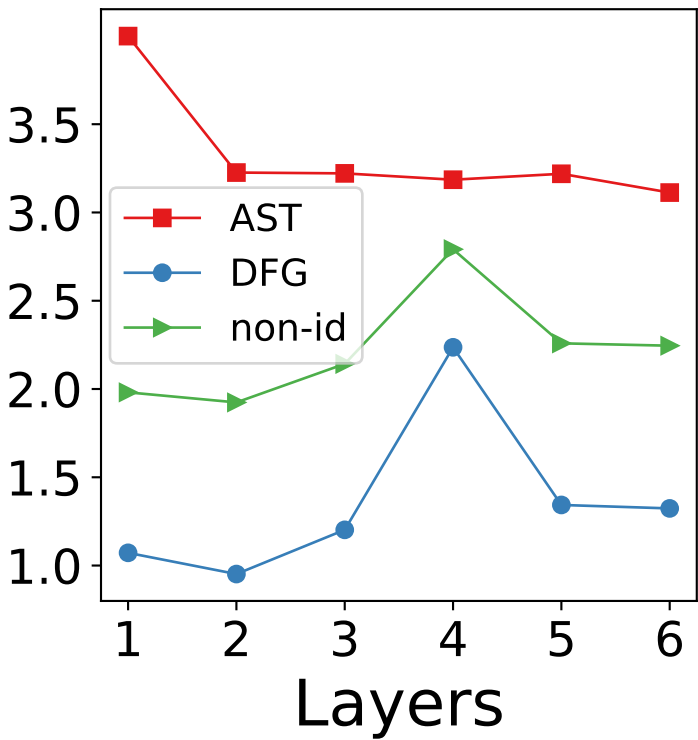

Supplement: supplementary_material [file attachment]

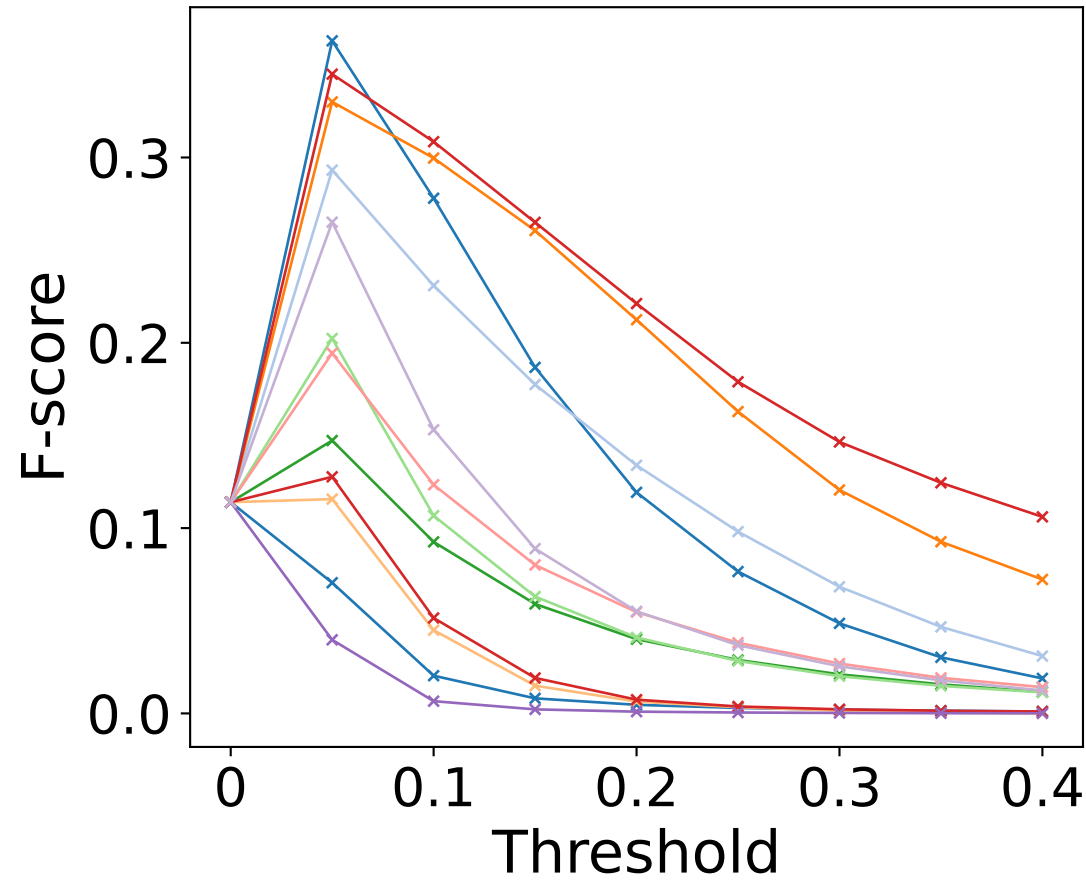

Supplement: supplementary_material [file attachment]
